# Supplementary material
Source: PubMed Central journal article supplement (PMC7197888)
Supplement: table-s1-189.pdf [file table-s1-189.pdf]

**Table S1.** Domains of the 32-Item Inflammatory Bowel Disease Questionnaire (IBDQ-32)

| <b>Domain</b>      | <b>No. of Items</b> | <b>Scoring Range</b> | <b>Concepts Assessed</b>                                                                                                   |
|--------------------|---------------------|----------------------|----------------------------------------------------------------------------------------------------------------------------|
| Bowel symptoms     | 10                  | 0–70                 | Stool frequency, loose stool, abdominal bloating and pain, excessive flatulence, rectal bleeding, urge to defecate, nausea |
| Systemic symptoms  | 5                   | 0–35                 | Fatigue, lack of energy, sleep problems, weight maintenance, general health                                                |
| Emotional function | 12                  | 0–84                 | Worry, anxiety, frustration, restlessness, depression, stress, embarrassment, anger                                        |
| Social function    | 5                   | 0–35                 | Ability to engage in social activities, work/school, sexual activity                                                       |
