# Supplementary material
Source: PubMed Central journal article supplement (PMC7197888)
Supplement: table-s2-189.pdf [file table-s2-189.pdf]

**Table S2.** Reasons for Exclusion of Articles During Abstract Screening

| Reasons for Exclusion                                                      | No. of Articles Excluded <sup>a</sup> |
|----------------------------------------------------------------------------|---------------------------------------|
| Article is an editorial/commentary                                         | 3                                     |
| Article reports a case study                                               | 2                                     |
| Article reports a meta-analysis/review                                     | 39                                    |
| Article reports a study protocol                                           | 9                                     |
| Article was not written in English                                         | 3                                     |
| Record was a conference paper or other unpublished source                  | 148                                   |
| Study administered variant of the IBDQ other than the IBDQ-32 <sup>b</sup> | 85                                    |
| Study does not measure quality of life                                     | 13                                    |
| Study included an active control                                           | 1                                     |
| Study sample did not include patients with IBD                             | 21                                    |
| Study sample has nonactive ulcerative colitis at baseline                  | 4                                     |
| Study sample includes collagenous colitis only                             | 3                                     |
| Study sample includes microscopic colitis only                             | 1                                     |
| Study sample includes patients with Crohn's disease only                   | 163                                   |
| Study sample includes pediatric ulcerative colitis only                    | 1                                     |
| Study sample includes ulcerative proctitis only                            | 2                                     |
| Study used a noncomparative intervention design                            | 27                                    |
| Study used a noninterventional design                                      | 159                                   |
| Study used a nonrandomized comparative intervention design                 | 23                                    |
| <b>Total no. of articles excluded</b>                                      | <b>707</b>                            |

*IBD, inflammatory bowel disease; IBDQ, Inflammatory Bowel Disease Questionnaire.*

<sup>a</sup>Articles may have met several exclusion criteria; however, for screening purposes, only the initially reported reason for exclusion was recorded.

<sup>b</sup>Variants of the IBDQ administered in these studies included the shortened IBDQ (SIBDQ; n=48), 36-item IBDQ (IBDQ-36; n=10), 9-item IBDQ (IBDQ-9; n=10), Norwegian version of the IBDQ (N-IBDQ; n=6), bowel symptoms-only version of the IBDQ (IBDQ-B; n=6), United Kingdom version of the IBDQ (UK-IBDQ; n=4), and emotional function-only version of the IBDQ (IBDQ-E; n=1).
