# Supplementary material
Source: PubMed Central journal article supplement (PMC7197888)
Supplement: table-s3-189.pdf [file table-s3-189.pdf]

**Table S3.** Reasons for Exclusion of Articles During Full-Text Article Screening

| Reasons for Exclusion                                                      | No. of Articles Excluded <sup>a</sup> |
|----------------------------------------------------------------------------|---------------------------------------|
| IBDQ-32 results were reported for a mixed-IBD sample only                  | 10                                    |
| Study administered variant of the IBDQ other than the IBDQ-32 <sup>b</sup> | 4                                     |
| Study did not administer IBDQ                                              | 5                                     |
| Study did not report usable IBDQ-32 data <sup>c</sup>                      | 8                                     |
| Study included an active control                                           | 1                                     |
| Study sample did not include patients with IBD                             | 1                                     |
| Study sample had nonactive ulcerative colitis at baseline                  | 1                                     |
| <b>Total no. of articles excluded</b>                                      | <b>30</b>                             |

*IBD, inflammatory bowel disease; IBDQ, Inflammatory Bowel Disease Questionnaire*

<sup>a</sup>Each excluded article may have met several exclusion criteria; however, for screening purposes, only the initially reported reason for exclusion was recorded.

<sup>b</sup>Variants of the IBDQ administered in these studies included the 9-item IBDQ (n=2) and the United Kingdom version of the IBDQ (n=2).

<sup>c</sup>Data were considered nonusable if they did not provide enough information to calculate an effect size statistic representing the magnitude of mean difference between change-from-baseline scores for treatment arm(s) and control arm at the final assessment of the primary efficacy endpoint.
