# Supplementary material
Source: PubMed Central journal article supplement (PMC7197888)
Supplement: table-s4-189.pdf [file table-s4-189.pdf]

**Table S4.** Reasons for Exclusion of Articles During Data Extraction

| <b>Reasons for Exclusion</b>                                | <b>No. of Articles Excluded<sup>a</sup></b> |
|-------------------------------------------------------------|---------------------------------------------|
| Clinical efficaciousness of treatment could not be assessed | 2                                           |
| Primary efficacy endpoint data were not available           | 1                                           |
| Study did not report usable IBDQ-32 data <sup>b</sup>       | 8                                           |
| Study included an active control                            | 6                                           |
| Study sample have nonactive ulcerative colitis at baseline  | 5                                           |
| <b>Total no. of articles excluded</b>                       | <b>22</b>                                   |

*IBDQ-32, 32-item Inflammatory Bowel Disease Questionnaire.*

<sup>a</sup>*Each excluded article may have met several exclusion criteria; however, for screening purposes, only the initially reported reason for exclusion was recorded.*

<sup>b</sup>*Data were considered nonusable if they did not provide enough information to calculate an effect size statistic representing the magnitude of mean difference between change-from-baseline scores for treatment arm(s) and control arm at the final assessment of the primary efficacy endpoint.*
