# Supplementary material
Source: PubMed Central journal article supplement (PMC7197888)
Supplement: table-s5-189.pdf [file table-s5-189.pdf]

**Table S5.** Results From Sensitivity Meta-Analysis Including All Treatment Arms

| Endpoint           | Efficacy Subgroup* | Within Subgroups |                                  |          |                       | Between Subgroups (Heterogeneity) |          |
|--------------------|--------------------|------------------|----------------------------------|----------|-----------------------|-----------------------------------|----------|
|                    |                    | No. of Studies   | Pooled Hedges' <i>g</i> (95% CI) | <i>P</i> | <i>I</i> <sup>2</sup> | <i>Q</i> (df)                     | <i>P</i> |
| Total score        | Non-efficacious    | 6                | 0.27 (0.02, 0.51)                | 0.033    | 0.6%                  | 6.30 (1)                          | 0.012    |
|                    | Efficacious        | 10               | 0.64 (0.48, 0.80)                | <0.001   | 76.6%                 |                                   |          |
| Bowel symptoms     | Non-efficacious    | 2                | 0.31 (-0.01, 0.63)               | 0.052    | 56.8%                 | 1.09 (1)                          | 0.297    |
|                    | Efficacious        | 3                | 0.49 (0.39, 0.60)                | <0.001   | 0%                    |                                   |          |
| Systemic symptoms  | Non-efficacious    | 2                | 0.14 (-0.18, 0.45)               | 0.387    | 0%                    | 2.58 (1)                          | 0.108    |
|                    | Efficacious        | 3                | 0.41 (0.31, 0.52)                | <0.001   | 0%                    |                                   |          |
| Emotional function | Non-efficacious    | 2                | 0.11 (-0.20, 0.43)               | 0.491    | 0%                    | 3.38 (1)                          | 0.066    |
|                    | Efficacious        | 3                | 0.42 (0.32, 0.53)                | <0.001   | 0%                    |                                   |          |
| Social function    | Non-efficacious    | 2                | 0.15 (-0.16, 0.47)               | 0.342    | 0%                    | 3.01 (1)                          | 0.083    |
|                    | Efficacious        | 3                | 0.45 (0.34, 0.55)                | <0.001   | 20.6%                 |                                   |          |

\*Efficacious treatments are those which achieved primary endpoint; non-efficacious treatments are those for which primary endpoint was not met.
