# Supplementary material
Source: PubMed Central journal article supplement (PMC7197888)
Supplement: table-s6-189.pdf [file table-s6-189.pdf]

**Table S6.** Results From Sensitivity Meta-Analysis Including High-Risk-of-Bias Study

| Endpoint           | Efficacy Subgroup* | Within Subgroups |                                  |          |                       | Between Subgroups (Heterogeneity) |          |
|--------------------|--------------------|------------------|----------------------------------|----------|-----------------------|-----------------------------------|----------|
|                    |                    | No. of Studies   | Pooled Hedges' <i>g</i> (95% CI) | <i>P</i> | <i>I</i> <sup>2</sup> | <i>Q</i> (df)                     | <i>P</i> |
| Total score        | Non-efficacious    | 7                | 0.26 (0.01, 0.52)                | 0.043    | 0%                    | 6.99 (1)                          | 0.008    |
|                    | Efficacious        | 10               | 0.67 (0.51, 0.83)                | <0.001   | 74.1%                 |                                   |          |
| Bowel symptoms     | Non-efficacious    | 3                | 0.25 (-0.08, 0.58)               | 0.143    | 0%                    | 3.53 (1)                          | 0.060    |
|                    | Efficacious        | 3                | 0.58 (0.47, 0.70)                | <0.001   | 0%                    |                                   |          |
| Systemic symptoms  | Non-efficacious    | 3                | 0.14 (-0.18, 0.45)               | 0.271    | 0%                    | 3.01 (1)                          | 0.083    |
|                    | Efficacious        | 3                | 0.41 (0.31, 0.52)                | <0.001   | 0%                    |                                   |          |
| Emotional function | Non-efficacious    | 3                | 0.24 (-0.09, 0.58)               | 0.148    | 28.2%                 | 1.86 (1)                          | 0.172    |
|                    | Efficacious        | 3                | 0.49 (0.37, 0.60)                | <0.001   | 0%                    |                                   |          |
| Social function    | Non-efficacious    | 3                | 0.08 (-0.25, 0.41)               | 0.626    | 0%                    | 7.05 (1)                          | 0.008    |
|                    | Efficacious        | 3                | 0.55 (0.44, 0.67)                | <0.001   | 0%                    |                                   |          |

\*Efficacious treatments are those which achieved primary endpoint; non-efficacious treatments are those for which primary endpoint was not met.
